# Supplementary material for: Outcome of a cohort of severe cerebral venous thrombosis in intensive care
Source: PubMed Central journal article supplement (PMC4828343; doi:10.1186/s13613-016-0135-7), 2016-04-12
Supplement: 13613_2016_135_MOESM1_ESM.pdf [file 13613_2016_135_MOESM1_ESM.pdf]

## ADDITIONAL FILE 1

### Outcome of a cohort of severe cerebral venous thrombosis in Intensive Care

**Risk factors of CVT in ICU from our cohort.** Risk factors were classified according to conditions described in literature. The association tobacco and oral contraception was less frequent than in literature. The 3 cases had solid cancer. Hematologic disorders were: sickle cell disease, myeloproliferative disorder, chronic lymphoid leukemia, thrombocytopenia, polycythemia, multiple myeloma and auto immune thrombotic purpura. Miscellaneous cases included diseases such as Behçet disease.

| Risk factors                                    | All CVTs<br>n=41 (%) | ICU Deaths<br>n=10 (%) | ICU<br>Survivors<br>n=31 (%) | p value |
|-------------------------------------------------|----------------------|------------------------|------------------------------|---------|
| Not identified                                  | 10 (24.4)            | 3 (30)                 | 7 (22.6)                     | 0.68    |
| Oral contraception and hormonal treatment       | 9 (21.5)             | 3 (30)                 | 6 (19.5)                     | 0.66    |
| Cancer related                                  | 7 (17.1)             | 1 (10)                 | 6 (19.5)                     | 0.65    |
| Tumor                                           | 3 (7.3)              | 1 (10)                 | 2 (6.5)                      | 1.00    |
| Radiotherapy                                    | 2 (4.9)              | -                      | 2 (6.5)                      | 1.00    |
| Chemotherapy                                    | 2 (4.9)              | -                      | 2 (6.5)                      | 1.00    |
| Hematologic disorders                           | 9 (21.5)             | 1 (10)                 | 8 (25.8)                     | 0.41    |
| Thrombo-embolic disease (personal and familial) | 8 (19.5)             | 1 (10)                 | 7 (22.6)                     | 0.65    |
| Miscellaneous                                   | 7 (17.1)             | 2 (20)                 | 5 (16.1)                     | 1.00    |
| Genetic pro-thrombotic conditions               | 5 (12.2)             | 1 (10)                 | 4 (12.9)                     | 1.00    |
| Protein S deficiency                            | 2 (4.9)              | 1 (10)                 | 1 (3.2)                      | 0.43    |
| MTHFR mutation                                  | 3 (7.3)              | 1 (10)                 | 2 (6.5)                      | 1.00    |
| Pregnancy and post partum                       | 5 (12.2)             | 2 (20)                 | 3 (9.7)                      | 0.58    |

|                       |          |        |          |      |
|-----------------------|----------|--------|----------|------|
| Smokers               | 1 (2.4)  | -      | 1 (3.2)  | 1.00 |
| $\geq 2$ risk factors | 9 (21.5) | 2 (20) | 7 (22.6) | 1.00 |
