# Supplementary material for: Outcome of a cohort of severe cerebral venous thrombosis in intensive care
Source: PubMed Central journal article supplement (PMC4828343; doi:10.1186/s13613-016-0135-7), 2016-04-12

## ADDITIONAL FILE 4

### Outcome of a cohort of severe cerebral venous thrombosis in Intensive Care

#### Summary of therapeutic decisions for a severe CVT case based on multimodal monitoring and imaging

Figure 2a shows low transcranial Doppler diastolic velocities (<10 cm/sec) with a low cerebral perfusion pressure (almost 40 mmHg; high ICP), which did not improve after decompressive craniectomy. A collegially decided thrombectomy improved cerebral hemodynamic at day 3, allowing to stop sedation and to evaluate clinical symptoms.

Figure 2b shows the initial venous induced ischemia (hypo density), the subarachnoid hemorrhage with cerebral edema with narrowed ventricles (1<sup>st</sup> picture). After decompressive craniectomy (2<sup>nd</sup> picture) ICP was persistently elevated in relation with hemorrhagic transformation and cerebral edema. Cerebral arteriography showed a non-recanalized superior sagittal sinus (SSS) despite adequate anticoagulation (3<sup>rd</sup> picture). After in situ thrombectomy and continuous thrombolysis, the flow in the SSS was re-established with a concomitant decrease of ICP (4<sup>th</sup> picture).

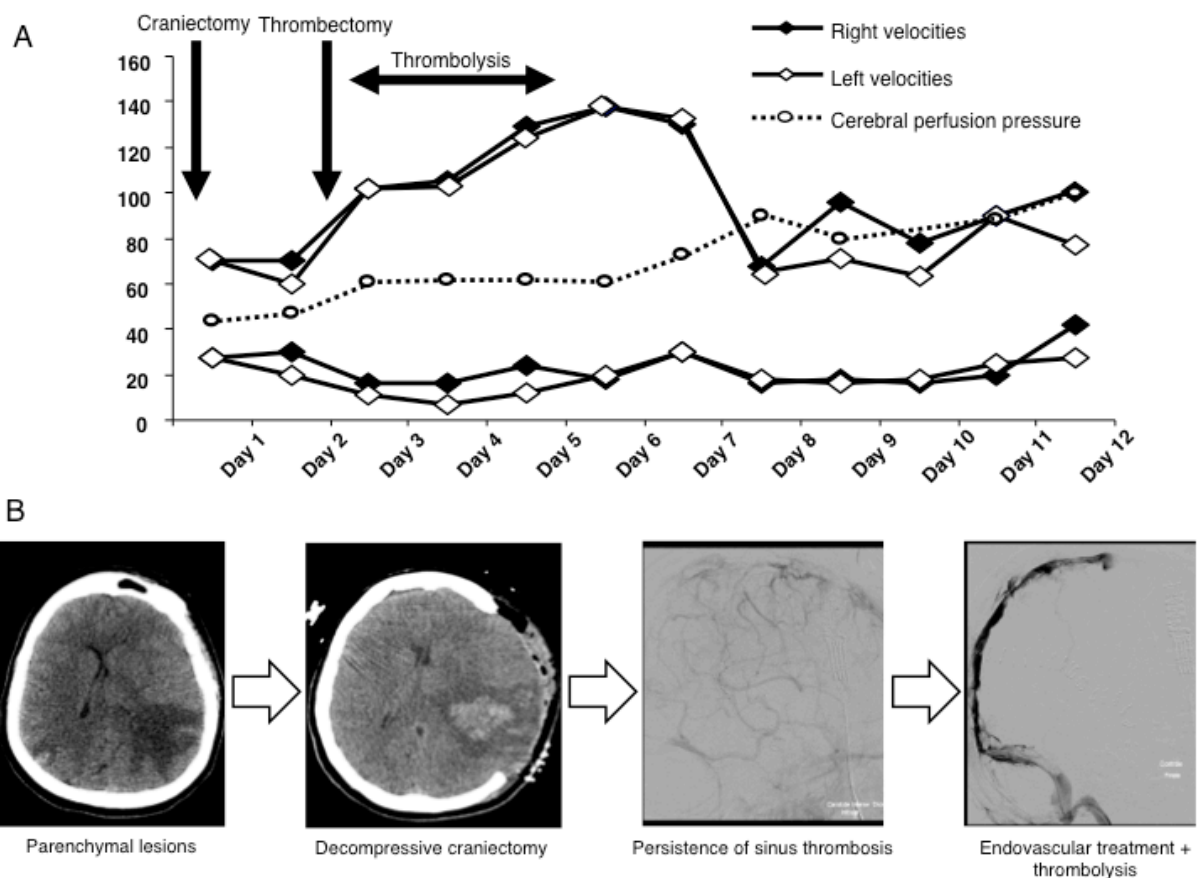

Supplement: 13613_2016_135_MOESM4_ESM.pdf [file 13613_2016_135_MOESM4_ESM.pdf]
